# Infiltrating neutrophils increase bladder cancer cell invasion *via* modulation of androgen receptor (AR)/MMP13 signals

ChangYi Lin<sup>1,\*</sup>, WanYing Lin<sup>1,\*</sup>, Shuyuan Yeh<sup>1</sup>, Lei Li<sup>1,2</sup>, Chawnshang Chang<sup>1,3</sup>

<sup>1</sup>George Whipple Lab for Cancer Research, Departments of Pathology and Urology, The Wilmot Cancer Center, University of Rochester Medical Center, Rochester 14642, New York, USA

<sup>2</sup>Sex Hormone Research Center, Department of Urology, The First Affiliated Hospital, Xi'an Jiaotong University, Xi'an 710061, China

<sup>3</sup>Sex Hormone Research Center, China Medical University/Hospital, Taichung 404, Taiwan

\*These authors have contributed equally to this work

## Correspondence to:

Lei Li, **e-mail:** lilydr@163.com

Chawnshang Chang, **e-mail:** chang@urmc.rochester.edu

**Keywords:** bladder cancer, neutrophil, microenvironment, androgen receptor

**Received:** April 14, 2015

**Accepted:** October 06, 2015

**Published:** October 16, 2015

## ABSTRACT

Early studies indicated that several inflammatory immune cells, including macrophages, mast cells, B and T cells in the tumor microenvironment, might influence cancer progression. Here we found that bladder cancer (BCa) cells could recruit more neutrophils than normal bladder cells. The consequences of recruiting more neutrophils might then increase BCa cell invasion *via* up-regulating androgen receptor (AR) signals. Mechanism dissection revealed infiltrating neutrophils could up-regulate AR signals *via* either increased AR mRNA/protein expression or increased AR transactivation. The increased AR signals might then enhance BCa cell invasion *via* increasing MMP13 expression. Together, these results might provide us a new potential therapeutic approach to better battle BCa metastasis *via* targeting the newly identified signaling from infiltrating neutrophils to BCa through AR to MMP13 signals.

## INTRODUCTION

Urothelial carcinoma of the bladder accounts for about 5% of all cancer deaths in humans [1]. Among those cancers, bladder cancer (BCa) is the sixth most common cancer in the United States. Interestingly, it is the third most common cancer in men, but the 11<sup>th</sup> most common cancer in women [1]. The majority of BCa is non-muscle invasive at diagnosis, and there is a high rate of tumor recurrence and progression even after local surgical therapy [3]. Thus, many patients may require follow-up examinations that include additional prophylactic treatments in the event of recurrence [4]. Therefore, BCa is the most expensive (estimated at \$3.7 billion annually [5]) malignancy to treat in the U.S.

It has become increasingly evident that cancer progression is influenced by the systemic inflammatory response, first described by Virchow in 1876 by demonstrating the presence of leukocytes in neoplastic tissues [6]. Inflammation in the tumor microenvironment plays an important role in the proliferation and survival

of malignant cells, as well as promoting angiogenesis and metastasis.

Epidemiological studies indicated that elevated neutrophil-to-lymphocyte ratios are correlated with a poor outcome in various tumors, including BCa [7–11]. Similar to the myeloid macrophages, neutrophils contain a subpopulation of neutrophils named tumor-associated neutrophils (TAN). The potential relationship between TAN infiltration and human cancer prognosis, especially the BCa progression, has not been systematically studied [12].

The androgen receptor (AR) mediates the actions of androgens to affect the development and progression of BCa [13–15]. Using AR knockout (ARKO) mice as an experimental animal BCa model, Miyamoto et al revealed that the AR signals might play a critical role in the development of chemical carcinogen (BBN)-induced bladder carcinogenesis [13, 14]. In our study, we found that BCa could recruit TAN to the BCa that might eventually increase BCa cell invasion *via* modulation of AR/MMP13 signals.

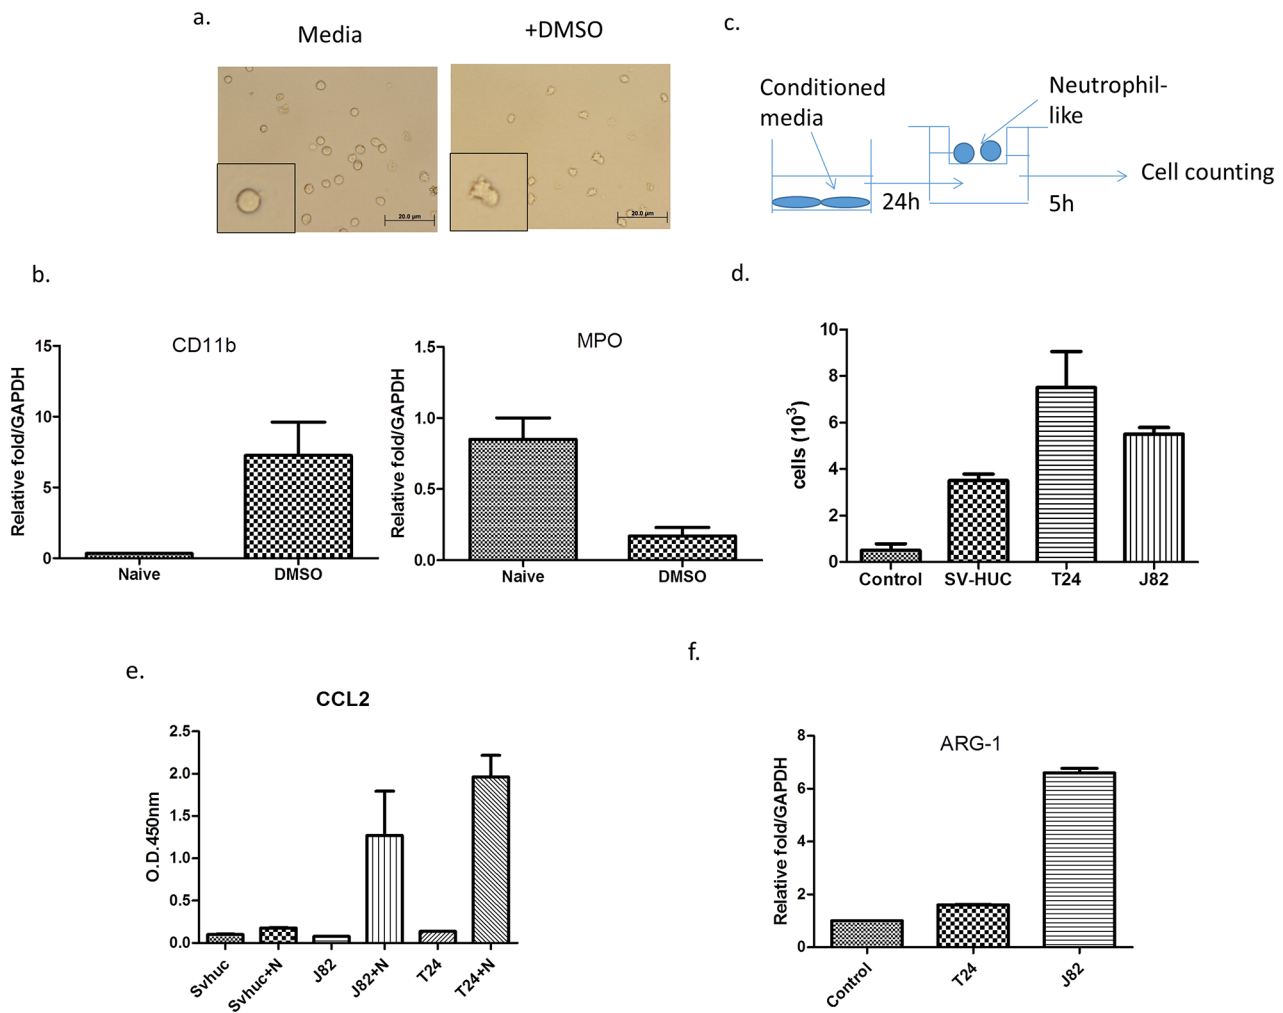

**Figure 1: BCa could recruit more N2-like neutrophils than non-malignant bladder cells.** **a.** We treated HL-60 cells with 1.25% DMSO to become differentiated N2 neutrophils (HL-60N) and **b.** determined the intracellular molecular markers including CD11b and MPO. **c.** A scheme of migration assay. **d.** Conditioned media (CM) from BCa cells could attract more HL-60N cells than CM from non-malignant bladder cells. **e.** *ARG-1* mRNA of neutrophils was upregulated after co-culturing with BCa. **f.** The CM from BCa and HL-60N co-culture contains more CCL2 than CM from non-malignant bladder cell HL-60N co-culture.

## RESULTS

### BCa cells recruit more neutrophils than non-malignant bladder cells

We first induced HL-60 into neutrophil-like cells (HL-60N) *via* adding 1.25% DMSO for four days. We then assayed the neutrophil-like phenotype *via* examining the increased CD11b expression and decreased the myeloperoxidase define this (MPO) based on the previous study [17] (Figure 1a–1b).

We then applied the co-culture migration assay [18] using conditioned media (CM) from either muscle-invasive (T24), muscle-invasive (J82) BCa cell lines or a normal bladder cell line (SV-HUC-1), to examine the HL-60N migration. The results revealed that CM from BCa (T24 or J82) could recruit more HL-60N neutrophil-like cells than CM from normal bladder SV-HUC-1 cells (Figure 1c–1d).

Together, results from Figure 1a–1d suggest that BCa cells can recruit more HL-60N cells than normal bladder cells.

We further confirmed that co-cultured neutrophils are N2-type neutrophils *via* examining the chemokine CCL2 expression, as previous studies indicated that the CCL2 secreted by tumors could convert surrounding neutrophils into N2 type neutrophils, named as tumor-associated neutrophils (TAN) [11]. The results revealed that after BCa cells were co-cultured with neutrophils, CCL2 was dramatically increased in the CM, but not after co-culture with normal bladder SV-HUC-1 cells (Figure 1e). Furthermore, the expression of N2 marker Arginase (*ARG-1*) [19] was also increased after co-culturing with BCa cells (Figure 1f). These data demonstrate that the neutrophils in the co-culture of BCa-neutrophils are TAN.

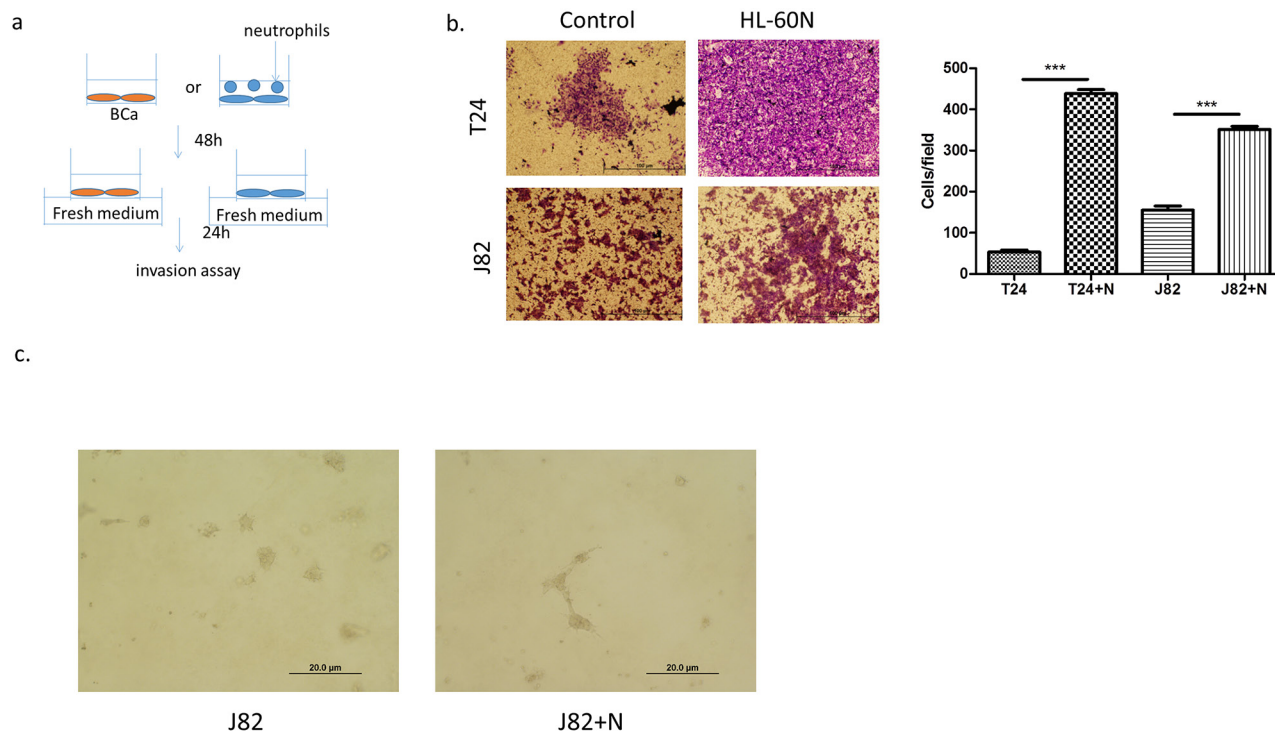

**Figure 2: Neutrophils could promote BCa invasion.** **a.** A scheme of invasion assay. **b.** Microscopic images of invasion assay. (scale bar = 100 μm) and quantitation of the result of invasion assay at right. (N = neutrophil; \*\*\* $p < 0.001$ ) **c.** Microscopic images of 3D invasion assay in J82 (N = neutrophil; scale bar = 20 μm).

### Infiltrated neutrophil cells increase BCa cell invasion

We next examined the potential effects on BCa progression after recruitment of more neutrophils into BCa cells. We first cultured BCa cells with or without HL-60N cells for 48 h and examined the cell invasion using transwell invasion assays. The results revealed that T24 cells co-cultured with HL-60N cells have 8 fold increased invasive capability (Figure 2a,  $p < 0.01$ ). Similar results were also obtained when we replaced T24 cells with J82 cells or HL-60N cells with PLB-985N cells (Figure 2b  $p < 0.001$ ; Supplementary Figure S1, S2). Importantly, we also obtained similar results using another 3D invasion assay (Figure 2c). Together, results from Figure 2a–2c suggest that recruited HL-60N cells into BCa cells may increase BCa cell invasion.

### Mechanism dissection how infiltrated neutrophil cells increased BCa cell invasion

Early studies indicated that AR might play important roles on BCa [14]. We are interested in examining the potential linkage of AR signals to the infiltrated HL-60N cells-increased BCa cell invasion. As shown in Figure 3a–3b, using real-time PCR and Western blot analysis, we found that co-culturing with HL-60N cells could increase the AR expression at the mRNA and

protein levels in BCa T24 cells, (Figure 3a) but not in J82 cells (Figure 3b).

Using ARE-luciferase assay to measure AR transactivation, we found infiltrated neutrophils could increase AR transactivation in T24 and J82 cells (Figure 3c), suggesting infiltrating neutrophils increase AR activity in BCa.

Together, results from Figure 3a–3c suggest that infiltrated neutrophil cells may function through modulating AR signals to increase BCa cell invasion.

### AR is a key factor to mediate infiltrated neutrophils-increased BCa cell invasion

To further demonstrate that infiltrated HL-60N could increase BCa cell invasion *via* altering AR signals, we first added functional AR into T24 and J82 cells and results revealed that higher expressed AR (Figure 4a) led to higher invasive capability in both T24 cells (Figure 4b;  $p < 0.01$ ) and J82 cells (Figure 4c;  $p < 0.05$ )

We then applied the interruption approach using AR-shRNA lentivirus to knock down AR expression in BCa cells and reduced the BCa cells invasion (Figure 4d;  $p < 0.01$ ). While infiltrated HL-60N cells increased the BCa cells invasion (Figure 4e;  $p < 0.001$ ), knocking-down AR could then significantly reduce the effect of HL-60N-increased BCa cells invasion (Figure 4f;  $p < 0.001$ ).

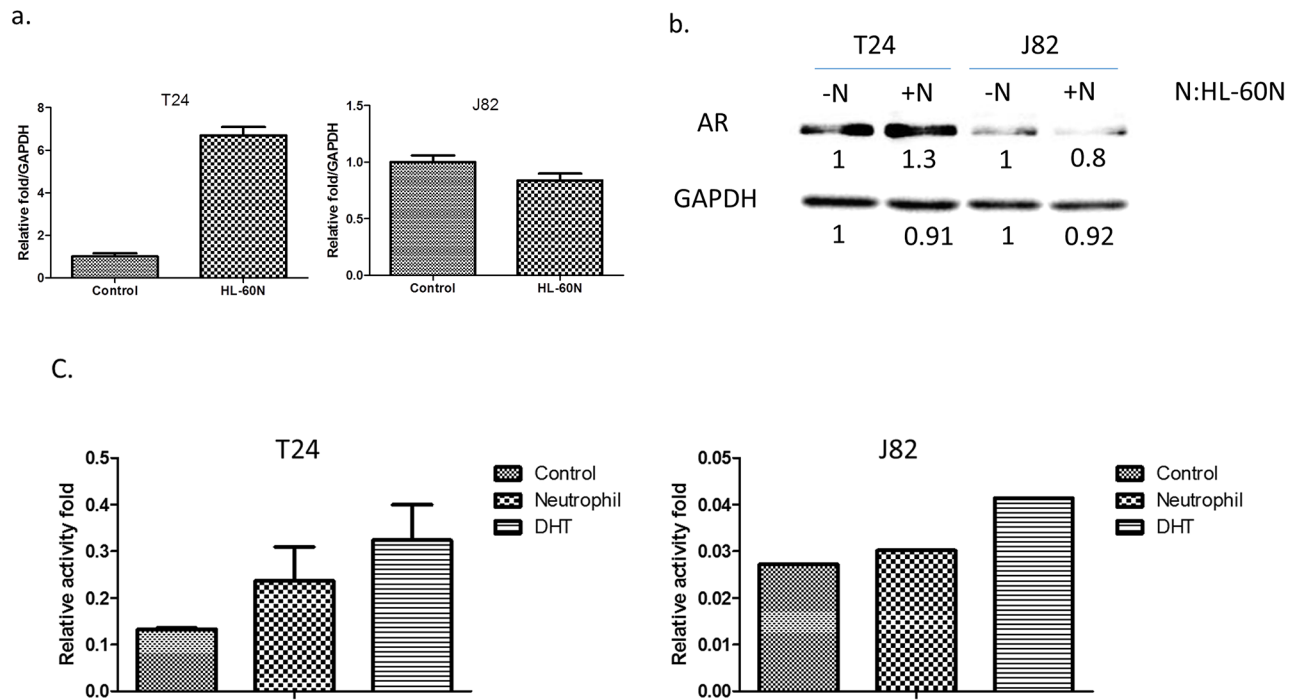

**Figure 3: BCa cells express higher level/activity of androgen receptor (AR) after co-culturing with HL-60N.** **a.** The AR expression at the mRNA level after co-culturing with HL-60N for 48 hours using real-time PCR. **b.** The AR expression at the protein level after co-culturing with HL-60N for 48 hours using western blot. **c.** Androgen response element reporter gene assay.

Together, results from Figure 4a–4f demonstrated that AR plays an important role to mediate the infiltrated neutrophil-increased BCa cell invasion.

### Mechanism dissection how increased BCa-AR enhanced the infiltrated HL-60N-increased BCa cell invasion

Top further investigate AR associated metastasis-related genes (Supplementary Table S1) in the co-cultured HL-60N and BCa cells, we then added AR-shRNA and found that *MMP1*, *MMP13* and *SYK* genes are up-regulated after co-culture with neutrophils and inhibited by adding AR-shRNA lentivirus in T24 cells (Figure 5a–5c). And *HIF1A* and *MMP13* are up-regulated by adding HL-60N and inhibited by adding AR-shRNA lentivirus in J82 (Figure 5d–5e). We decided to choose *MMP13* for further study since its expression was up-regulated in both BCa T24 and J82 cells. Using an interruption approach, we found that infiltrated neutrophils could increase *MMP13* expression and adding *MMP13*-shRNA then reversed the infiltrated neutrophil-induced *MMP13* expression (Figure 5f) and infiltrated neutrophil-increased BCa cell invasion in T24 (Figure 5g) and J82 (Figure 5h).

Together, results from Figure 5a–5h demonstrated that the AR/*MMP13* axis played an important role to mediate the infiltrated neutrophil-increased BCa cell invasion.

## DISCUSSION

It is of clinical interest to investigate how the BCa tumors interact with infiltrating immune cells from the surrounding the tumor microenvironment (TME), and how the tumor-associated-immune cells increase BCa development. In this study, we found that BCa could recruit more neutrophils to the tumor site than to the normal bladder cells. The consequences of such recruitment indicated more TAN could then increase BCa cell invasion *via* modulation of AR/*MMP13* signals.

Early studies indicated that individual cells in the TME might play important roles in tumor progression [20]. For example, fibroblasts might secrete growth factors to increase prostate cancer growth and invasion [21]. Infiltrating macrophages and T cells could increase prostate cancer metastasis through modulation of the CCL2-STAT3 signals or AR-*MMP9* signals [22, 23].

Higher neutrophil-to-lymphocyte ratios were also linked to the poor BCa outcome [7, 24], and TAN might function through secreting some cytokines and/or chemokines to influence the TME that resulted in altering the tumor progression. However, both anti-tumor vs pro-tumor paradigms exist for macrophage (M1/M2) [25–27], T-cell (Th1/Th2) polarization [28, 29] and neutrophils (N1/N2) [11]. Suppression of these anti-tumor (N1) neutrophils may impair CD8<sup>+</sup> T-cell activation

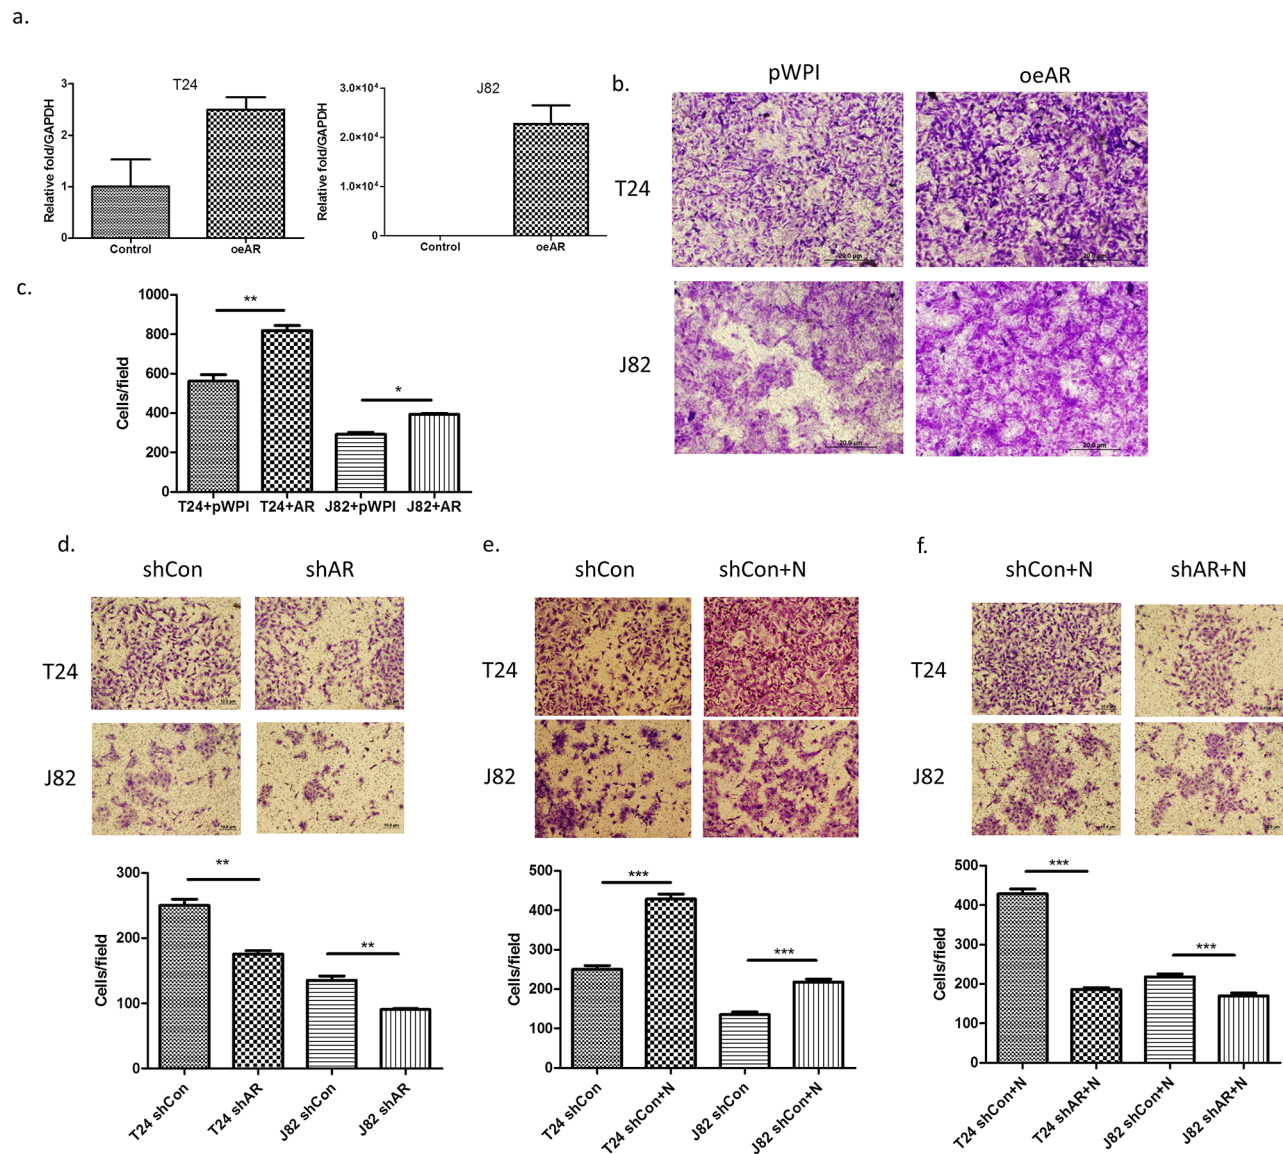

**Figure 4: AR is involved in the invasion-promoting effect induced by neutrophils. a.** AR mRNA expression after using lentivirus to overexpress AR (oeAR) in BCa cells. **b.** Microscopic images of invasion assay of cells in a. (scale bar = 20  $\mu$ m). **c.** Quantitation of the result of invasion assay of Figure 5b. **d.** Microscopic images of BCa invasion assay after knocking down AR (shAR). (scale bar = 20  $\mu$ m). **e.** Microscopic images of shControl (shCon) BCa invasion assay after co-culturing with neutrophils. **f.** Microscopic images of HL-60N cells co-cultured with BCa cells after BCa after knocking down AR (shAR). Quantitation is below images in d-f. \*\* $p < 0,01$ ; \*\*\* $p < 0.001$ ; pWPI = vector control; N = Neutrophils.

with increased tumor burden [30]. Further studies also suggested that those anti-tumor N1 cells generated in the absence of TGF- $\beta$  might produce higher levels of TNF- $\alpha$ , MIP-1 $\alpha$ , H<sub>2</sub>O<sub>2</sub> and NO, that were cytotoxic to tumor cells *in vitro* and *in vivo* [11, 30]. In contrast, most TAN appear to have an N2 phenotype and thus contribute to tumor growth and immuno-suppression [30]. Suppression of these pro-tumor N2 neutrophils might then lead to decreased tumor growth [31, 32] and be consistent with our data showing suppression of the infiltrating N2 like HL-60N neutrophils leads to decreased BCa cell invasion. These DMSO-induced differentiated HL-60N

neutrophils have been reported to have qualitatively and quantitatively similar responses to chemo-attractants [33] and apocynin [34].

AR has been indicated to play an important role in the development and progression of BCa [14, 35–37]. However, there are controversial results coming from clinical data showing discrepancies in the findings in terms of AR expression in BCa [38–40]. These conflicts may be due to differences in the methods of tissue preparation, experimental conditions, and evaluation system used for immunostaining. In spite of the inconsistent results of AR expression in clinical data, several studies

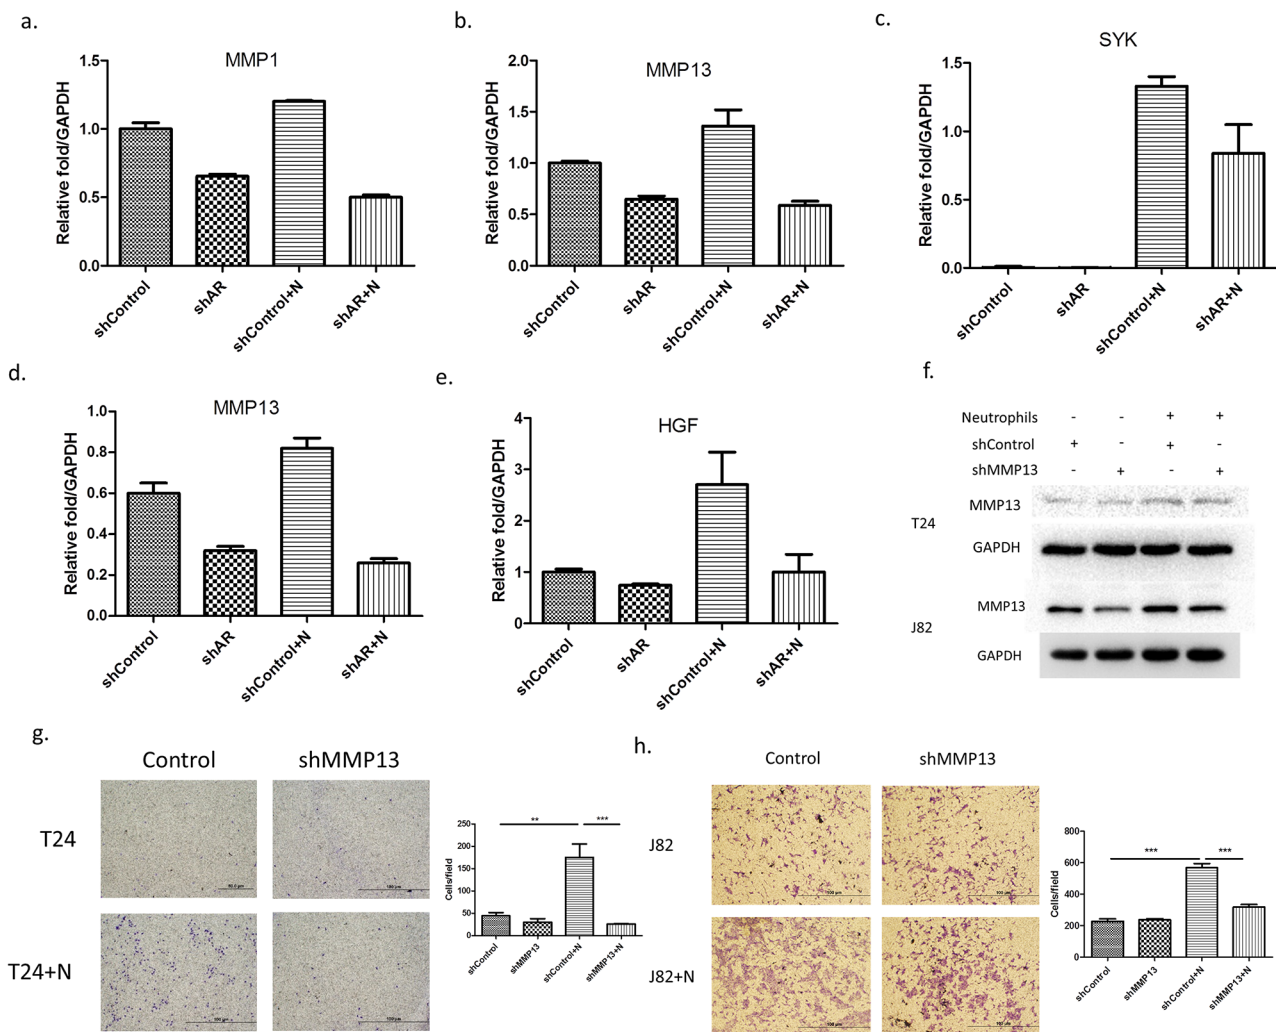

**Figure 5: Metastasis-associated genes are involved in the neutrophils-promoting invasion through AR. (a-c) the expressions.** The expression of MMP1 (a) MMP13 (b) and SYK (c) were upregulated by co-culturing T-24 cells with HL-60N and inhibited by knocking down AR (shAR). (d-e) The expressions of MMP13 **d.** and HGF **e.** were up-regulated by co-culturing J82 cells with HL-60N and inhibited by knocking down AR in J82. **f.** MMP13 expression level of T24 and J82 cells after co-culture with HL-60N for 48 hours using western blot. **(g-h.)** microscopic images of T24 (g) and J82 (h) cells with and without knocked down MMP13 (shMMP13) and with and without co-culture with neutrophils, quantitations at right. (scale bars = 20  $\mu$ m) (N: HL-60N). \*\* $p < 0,01$ ; \*\*\* $p < 0.001$ .

provided promising evidence that androgens promote the proliferation and metastasis of AR-positive BCa cells [14, 36, 37, 41]. Activated AR might promote BCa invasion *via* MMP9 and epithelial-mesenchymal transition [36, 41]. In this present study, our data showed recruited neutrophils could promote invasion *via* modulating AR/MMP13 signaling pathway by silencing AR or MMP13.

MMP13 was first identified in breast carcinoma [42]. Compared with the other MMPs, MMP13 has wide substrate specificity and a limited expression pattern [43]. Expression of MMP13 is observed to be limited to tissues undergoing rapid connective tissue remodeling, such as during fetal bone development, post-natal bone remodeling and gingival wound repair [44]. However, MMP13 is also expressed in various diseases involving degradation of collagenous extracellular matrix and in

malignant tumors, such as squamous cell carcinomas of the head and neck, cutaneous basal-cell carcinomas, chondrosarcomas and melanomas [45]. In BCa, it was demonstrated that MMP13 was expressed little in normal bladder cells yet it was expressed in tumor cells, particularly at the invading edges [46], suggesting that MMP13 may serve as a marker for tumor transformation and invasion and can be a potential therapeutic target. Our results showing that recruited neutrophils increased BCa cell invasion *via* up-regulation of AR/MMP13 signals are in agreement with early findings.

In summary, finding a new signal from infiltrating neutrophils to BCa through AR to MMP13 to increase BCa cell invasion not only strengthens the importance of AR roles in BCa progression, it may also provide a potential therapeutic approach to better suppress BCa metastasis.

## MATERIALS AND METHODS

### Cell culture and stable cell lines

The human BCa cell lines T24 (with high endogenous AR) and J82 (with low endogenous AR) as well as normal human uroepithelium cell line, SV-HUC-1 were purchased from ATCC and cells were maintained in Dulbecco's Minimum Essential Medium (DMEM) (Invitrogen, Carlsbad, CA) with 10% fetal bovine serum (FBS) and 1% antibiotics. The immature neutrophils, HL-60 and PLB-985, were stimulated with 1.25% DMSO for 1 weeks to be differentiated into N2 type neutrophils, named HL-60N and PLBN, and were maintained in 10% heat-inactivated FBS containing RPMI media with antibiotics. All cell lines were cultured in a 5% (v/v) CO<sub>2</sub> humidified incubator at 37°C. The AR knockdown and overexpressing BCa cells were established by lentiviral transduction of siAR or AR cDNA, respectively.

### Lentiviral expression plasmid construction and virus production

ShAR (PLKO.1-puro-shAR) was constructed with target sequence 5'-GTCGCGACTACTACAACCTT-3' and shMMP13 was constructed with target sequence 5'-CCAACCGTATTGATGCTGC-3' according to Addgene's pLKO.1 protocol. Lentiviral particles were generated by calcium phosphate transfection of lentiviral expressing, packaging and envelop plasmids into HEK293T cells. Lentiviral particles were collected to infect target cells according to a previous report [16].

### Invasion and migration assay

For *in vitro* invasion assays, the upper chambers of the transwells (8 µm pore size) were pre-coated with the growth factor-reduced matrigel (matrigel: serum free DMEM = 1:15) (BD Biosciences). Before invasion assays, 1 × 10<sup>6</sup> BCa cells were co-cultured with 1 × 10<sup>5</sup> HL-60N cells for 2 days in 10-cm dishes. The parental BCa cells or co-cultured BCa (1 × 10<sup>5</sup>) were plated onto the upper chambers of the transwells. After 24 hrs incubation, the cells in the upper chambers were removed. The insert membranes were fixed with methanol, stained with crystal violet, and the positively stained cells invaded to the under part of the membranes were counted. The invaded BCa cell numbers were averaged from counting numbers of five random fields. Each data point was run in triplicate and each set of experiments were performed in triplicate for calculation as mean ± SEM. For 3D invasion, we thawed Matrigel on ice and added 40 µl to each well of 8-well glass chamber slide (at 50 µl/cm<sup>2</sup>) and spread the Matrigel evenly. Place the slides in the cell culture incubator and allow the Matrigel to solidify (takes 15–20 min). Plate 1 × 10<sup>4</sup> J82 cells after co-culture with HL-60N into each well with media containing 5% Matrigel and

10 ng/ml EGF. We changed media every 3 days with assay media containing 2.5% Matrigel and 5.0 ng/ml EGF. J82 cells take about 7 days to form protrusion structures. 10 different fields under 200x microscope were chosen randomly to count the number of protrusions on cells in each field. For *in vitro* migration assay, the 1 × 10<sup>5</sup> HL-60N were plated onto the 6 µm pore size upper chambers of transwells. The CM of various co-cultured cells was placed into bottom well to attract HL-60N. After 5 hrs incubation, the HL-60N were collected and calculated from the bottom well.

### Quantitative PCR

Total RNA was extracted from each cell line using Trizol (Invitrogen). Reverse transcription was performed using the iScript reverse transcription kit (Bio-Rad). Quantitative real-time PCR (qRT-PCR) was conducted using a Bio-Rad CFX96 system with SYBR green to determine the levels of mRNA expression of listed genes. Expression levels were normalized to the expression of GAPDH mRNA.

### Western blot assay

Cells were washed twice in PBS and lysed with RIPA buffer containing 1% protease inhibitors (Amresco, Cochran, USA). Protein concentrations in the cell lysate solutions were determined by BCA protein assay (Amresco, Cochran, USA). Each cell lysate was mixed with 5 × SDS-PAGE loading buffer (Amresco). Equivalent protein quantities were loaded to 10% SDS-polyacrylamide gels (Bio-Rad). Proteins were electrottransferred to PVDF membranes (Millipore, Atlanta GA, USA) that were blocked in Tris-buffered saline plus 0.05% Tween-20 (TBS-T) containing 5% non-fat dried milk for 1 hr. The membranes were washed in TBS-T and incubated with each primary monoclonal antibody overnight at 4°C. The following primary antibodies were used: rabbit anti-AR polyclonal antibody, and mouse anti-GAPDH monoclonal antibody (Santa Cruz) and mouse anti-MMP13 monoclonal antibody were used at 1:1,000 dilution. The immuno-positive bands were visualized with an ECL chemiluminescent detection system (Thermo Scientific), and the images were transferred to the Bio-Rad imaging system. All analyses were performed at least in duplicate.

### Statistical analysis

Data are presented as mean ± SEM from at least 3 independent experiments. Statistical analyses involved paired *t*-test with SPSS 17.0 (SPSS Inc., Chicago, IL). *In vivo* study measurements of tumor metastasis among the three groups were analyzed through one-way ANOVA coupled with the Newman-Keuls test. *P* < 0.05 was considered statistically significant.

## ACKNOWLEDGMENTS AND FUNDING

This work was supported by NIH grants (CA155477 and CA156700), George Whipple Professorship Endowment and Taiwan Department of Health Clinical Trial, Research Center of Excellence (DOH99-TD-B-111-004 to China Medical University, Taichung, Taiwan). We thank Karen Wolf for help preparing the manuscript.

## CONFLICTS OF INTEREST

There is no conflict of interest disclose.

## REFERENCES

1. Griffith TS, Kucaba TA, O'Donnell MA, Burns J, Benetatos C, McKinlay MA, Condon S and Chunduru S. Sensitization of human bladder tumor cells to TNF-related apoptosis-inducing ligand (TRAIL)-induced apoptosis with a small molecule IAP antagonist. *Apoptosis: an international journal on programmed cell death*. 2011; 16:13-26.
2. (2015). American Cancer Society: Cancer Facts and Figures 2015. American Cancer Society Atlanta, Ga).
3. Pastorelli R, Saletta F, Carpi D, Campagna R, dell'Osta C, Schiarea S, Vineis P, Airoidi L and Matullo G. Proteome characterization of a human urothelial cell line resistant to the bladder carcinogen 4-aminobiphenyl. *Proteome science*. 2007; 5:6.
4. Brincks EL, Risk MC and Griffith TS. PMN and anti-tumor immunity—the case of bladder cancer immunotherapy. *Seminars in cancer biology*. 2013; 23:183-189.
5. Botteman MF, Pashos CL, Redaelli A, Laskin B and Hauser R. The health economics of bladder cancer: a comprehensive review of the published literature. *PharmacoEconomics*. 2003; 21:1315-1330.
6. Balkwill F and Mantovani A. Inflammation and cancer: back to Virchow? *Lancet*. 2001; 357:539-545.
7. Kang MH, Go SI, Song HN, Lee A, Kim SH, Kang JH, Jeong BK, Kang KM, Ling H and Lee GW. The prognostic impact of the neutrophil-to-lymphocyte ratio in patients with small-cell lung cancer. *British journal of cancer*. 2014; 111:452-460.
8. Proctor MJ, McMillan DC, Morrison DS, Fletcher CD, Horgan PG and Clarke SJ. A derived neutrophil to lymphocyte ratio predicts survival in patients with cancer. *British journal of cancer*. 2012; 107:695-699.
9. Guthrie GJ, Charles KA, Roxburgh CS, Horgan PG, McMillan DC and Clarke SJ. The systemic inflammation-based neutrophil-lymphocyte ratio: experience in patients with cancer. *Critical reviews in oncology/hematology*. 2013; 88:218-230.
10. Templeton AJ, McNamara MG, Seruga B, Vera-Badillo FE, Aneja P, Ocana A, Leibowitz-Amit R, Sonpavde G, Knox JJ, Tran B, Tannock IF and Amir E. Prognostic role of neutrophil-to-lymphocyte ratio in solid tumors: a systematic review and meta-analysis. *Journal of the National Cancer Institute*. 2014; 106:dju124.
11. Fridlender ZG, Sun J, Kim S, Kapoor V, Cheng G, Ling L, Worthen GS and Albelda SM. Polarization of tumor-associated neutrophil phenotype by TGF-beta: "N1" versus "N2" TAN. *Cancer cell*. 2009; 16:183-194.
12. Fridlender ZG, Sun J, Mishalian I, Singhal S, Cheng G, Kapoor V, Hornig W, Fridlender G, Bayuh R, Worthen GS and Albelda SM. Transcriptomic analysis comparing tumor-associated neutrophils with granulocytic myeloid-derived suppressor cells and normal neutrophils. *PLoS one*. 2012; 7:e31524.
13. Hsu JW, Hsu I, Xu D, Miyamoto H, Liang L, Wu XR, Shyr CR and Chang C. Decreased tumorigenesis and mortality from bladder cancer in mice lacking urothelial androgen receptor. *The American journal of pathology*. 2013; 182:1811-1820.
14. Miyamoto H, Yang Z, Chen YT, Ishiguro H, Uemura H, Kubota Y, Nagashima Y, Chang YJ, Hu YC, Tsai MY, Yeh S, Messing EM and Chang C. Promotion of bladder cancer development and progression by androgen receptor signals. *Journal of the National Cancer Institute*. 2007; 99:558-568.
15. Izumi K, Zheng Y, Hsu JW, Chang C and Miyamoto H. Androgen receptor signals regulate UDP-glucuronosyltransferases in the urinary bladder: a potential mechanism of androgen-induced bladder carcinogenesis. *Molecular carcinogenesis*. 2013; 52:94-102.
16. Lin SJ, Lee SO, Lee YF, Miyamoto H, Yang DR, Li G and Chang C. TR4 nuclear receptor functions as a tumor suppressor for prostate tumorigenesis via modulation of DNA damage/repair system. *Carcinogenesis*. 2014; 35:1399-1406.
17. Le Cabec V, Calafat J and Borregaard N. Sorting of the specific granule protein, NGAL, during granulocytic maturation of HL-60 cells. *Blood*. 1997; 89:2113-2121.
18. Ding X, Yang DR, Xia L, Chen B, Yu S, Niu Y, Wang M, Li G and Chang C. Targeting TR4 nuclear receptor suppresses prostate cancer invasion via reduction of infiltrating macrophages with alteration of the TIMP-1/MMP2/MMP9 signals. *Molecular cancer*. 2015; 14:16.
19. Fridlender ZG and Albelda SM. Tumor-associated neutrophils: friend or foe? *Carcinogenesis*. 2012; 33:949-955.
20. Soussi NE and Noel A. Targeting the tumor microenvironment for cancer therapy. *Clinical chemistry*. 2013; 59:85-93.
21. Yu S, Xia S, Yang D, Wang K, Yeh S, Gao Z and Chang C. Androgen receptor in human prostate cancer-associated fibroblasts promotes prostate cancer epithelial cell growth and invasion. *Medical oncology*. 2013; 30:674.
22. Izumi K, Fang LY, Mizokami A, Namiki M, Li L, Lin WJ and Chang C. Targeting the androgen receptor with siRNA promotes prostate cancer metastasis through enhanced macrophage recruitment via CCL2/CCR2-induced STAT3 activation. *EMBO molecular medicine*. 2013; 5:1383-1401.



23. Hu S, Li L, Yeh S, Cui Y, Li X, Chang HC, Jin J and Chang C. Infiltrating T cells promote prostate cancer metastasis via modulation of FGF11—>miRNA-541—> androgen receptor (AR)—>MMP9 signaling. *Molecular oncology*. 2015; 9:44-57.
24. Mano R, Baniel J, Shoshany O, Margel D, Bar-On T, Nativ O, Rubinstein J and Halachmi S. Neutrophil-to-lymphocyte ratio predicts progression and recurrence of non-muscle-invasive bladder cancer. *Urologic oncology*. 2015; 33:67 e61-67.
25. Comito G, Giannoni E, Segura CP, Barcellos-de-Souza P, Raspollini MR, Baroni G, Lanciotti M, Serni S and Chiarugi P. Cancer-associated fibroblasts and M2-polarized macrophages synergize during prostate carcinoma progression. *Oncogene*. 2014; 33:2423-2431.
26. Pollard JW. Tumour-educated macrophages promote tumour progression and metastasis. *Nature reviews Cancer*. 2004; 4:71-78.
27. Sica A, Schioppa T, Mantovani A and Allavena P. Tumour-associated macrophages are a distinct M2 polarised population promoting tumour progression: potential targets of anti-cancer therapy. *European journal of cancer*. 2006; 42:717-727.
28. Disis ML. Immune regulation of cancer. *Journal of clinical oncology : official journal of the American Society of Clinical Oncology*. 2010; 28:4531-4538.
29. Jones EA, Pringle JH, Angel CA and Rees RC. Th1/Th2 cytokine expression and its relationship with tumor growth in B cell non-Hodgkin's lymphoma (NHL). *Leukemia & lymphoma*. 2002; 43:1313-1321.
30. Peng J, Tsang JY, Li D, Niu N, Ho DH, Lau KF, Lui VC, Lamb JR, Chen Y and Tam PK. Inhibition of TGF-beta signaling in combination with TLR7 ligation reprograms a tumoricidal phenotype in tumor-associated macrophages. *Cancer letters*. 2013; 331:239-249.
31. Nozawa H, Chiu C and Hanahan D. Infiltrating neutrophils mediate the initial angiogenic switch in a mouse model of multistage carcinogenesis. *Proceedings of the National Academy of Sciences of the United States of America*. 2006; 103:12493-12498.
32. Pekarek LA, Starr BA, Toledano AY and Schreiber H. Inhibition of tumor growth by elimination of granulocytes. *The Journal of experimental medicine*. 1995; 181:435-440.
33. Hauert AB, Martinelli S, Marone C and Niggli V. Differentiated HL-60 cells are a valid model system for the analysis of human neutrophil migration and chemotaxis. *The international journal of biochemistry & cell biology*. 2002; 34:838-854.
34. De Almeida AC, Dos Santos Vilela MM, Condino-Neto A and Ximenes VF. The importance of myeloperoxidase in apocynin-mediated NADPH oxidase inhibition. *ISRN inflammation*. 2012; 2012:260453.
35. Kauffman EC, Robinson BD, Downes MJ, Powell LG, Lee MM, Scherr DS, Gudas LJ and Mongan NP. Role of androgen receptor and associated lysine-demethylase coregulators, LSD1 and JMJD2A, in localized and advanced human bladder cancer. *Molecular carcinogenesis*. 2011; 50:931-944.
36. Wu JT, Han BM, Yu SQ, Wang HP and Xia SJ. Androgen receptor is a potential therapeutic target for bladder cancer. *Urology*. 2010; 75:820-827.
37. Zheng Y, Izumi K, Yao JL and Miyamoto H. Dihydrotestosterone upregulates the expression of epidermal growth factor receptor and ERBB2 in androgen receptor-positive bladder cancer cells. *Endocrine-related cancer*. 2011; 18:451-464.
38. Boorjian S, Ugras S, Mongan NP, Gudas LJ, You X, Tickoo SK and Scherr DS. Androgen receptor expression is inversely correlated with pathologic tumor stage in bladder cancer. *Urology*. 2004; 64:383-388.
39. Zhuang YH, Blauer M, Tammela T and Tuohimaa P. Immunodetection of androgen receptor in human urinary bladder cancer. *Histopathology*. 1997; 30:556-562.
40. Mir C, Shariat SF, van der Kwast TH, Ashfaq R, Lotan Y, Evans A, Skeldon S, Hanna S, Vajpeyi R, Kuk C, Alkhateeb S, Morote J, van Rhijn BW, Bostrom P, Yao J, Miyamoto H, et al. Loss of androgen receptor expression is not associated with pathological stage, grade, gender or outcome in bladder cancer: a large multi-institutional study. *BJU international*. 2011; 108:24-30.
41. Jing Y, Cui D, Guo W, Jiang J, Jiang B, Lu Y, Zhao W, Wang X, Jiang Q, Han B and Xia S. Activated androgen receptor promotes bladder cancer metastasis via Slug mediated epithelial-mesenchymal transition. *Cancer letters*. 2014; 348:135-145.
42. Freije JM, Diez-Itza I, Balbin M, Sanchez LM, Blasco R, Tolivia J and Lopez-Otin C. Molecular cloning and expression of collagenase-3, a novel human matrix metalloproteinase produced by breast carcinomas. *The Journal of biological chemistry*. 1994; 269:16766-16773.
43. Saarialho-Kere U, Kerkela E, Jeskanen L, Hasan T, Pierce R, Starcher B, Raudasoja R, Ranki A, Oikarinen A and Vaalamo M. Accumulation of matrilysin (MMP-7) and macrophage metalloelastase (MMP-12) in actinic damage. *The Journal of investigative dermatology*. 1999; 113:664-672.
44. Ravanti L, Heino J, Lopez-Otin C and Kahari VM. Induction of collagenase-3 (MMP-13) expression in human skin fibroblasts by three-dimensional collagen is mediated by p38 mitogen-activated protein kinase. *The Journal of biological chemistry*. 1999; 274:2446-2455.
45. Westermark J and Kahari VM. Regulation of matrix metalloproteinase expression in tumor invasion. *FASEB journal : official publication of the Federation of American Societies for Experimental Biology*. 1999; 13:781-792.
46. Bostrom PJ, Ravanti L, Reunanen N, Aaltonen V, Soderstrom KO, Kahari VM and Laato M. Expression of collagenase-3 (matrix metalloproteinase-13) in transitional-cell carcinoma of the urinary bladder. *International journal of cancer Journal international du cancer*. 2000; 88:417-423.
