# Supplementary material for: Infiltrating neutrophils increase bladder cancer cell invasion via modulation of androgen receptor (AR)/MMP13 signals
Source: PubMed Central journal article supplement (PMC4767492; doi:10.18632/oncotarget.5638), 2015-10-16
Supplement: oncotarget-06-43081-s001.pdf [file oncotarget-06-43081-s001.pdf]

SUPPLEMENTARY FIGURES AND TABLE

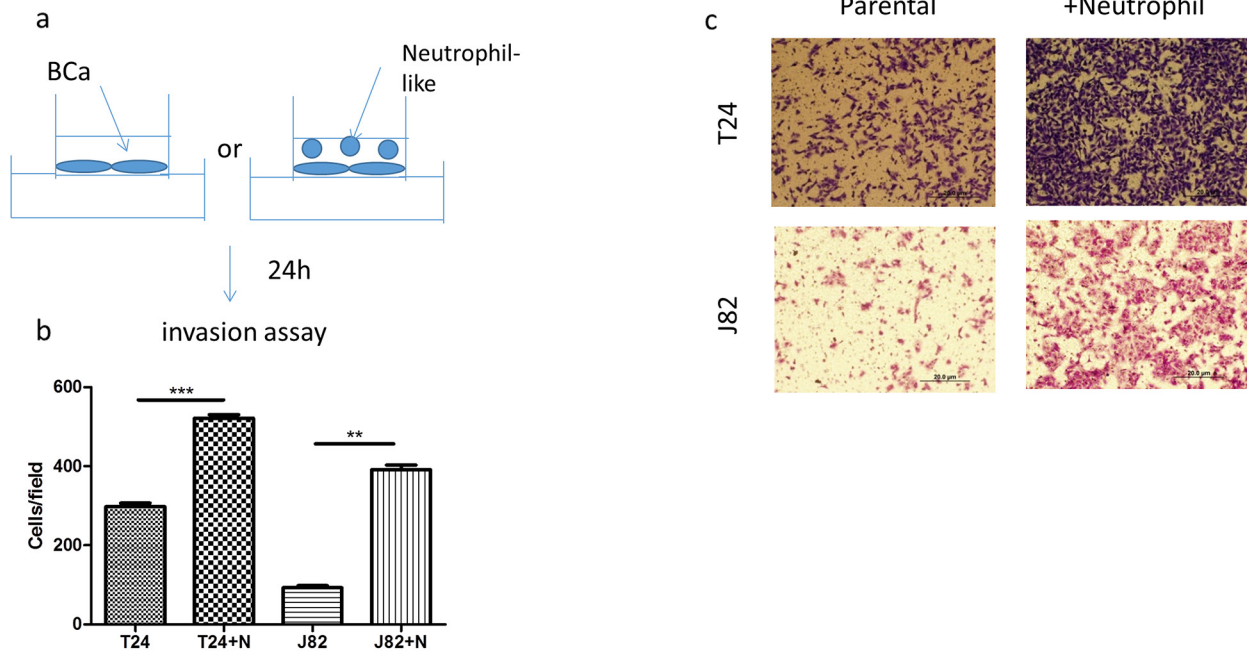

**Supplementary Figure S1: Neutrophils could promote BCa invasion.** **a.** A scheme of invasion assay. **b.** Quantitation of the results of invasion assay in **c.** **c.** Microscopic images of invasion assay. (scale bar = 20  $\mu$ m). (N = neutrophil  $**p < 0.01$ ;  $***p < 0.001$ ).

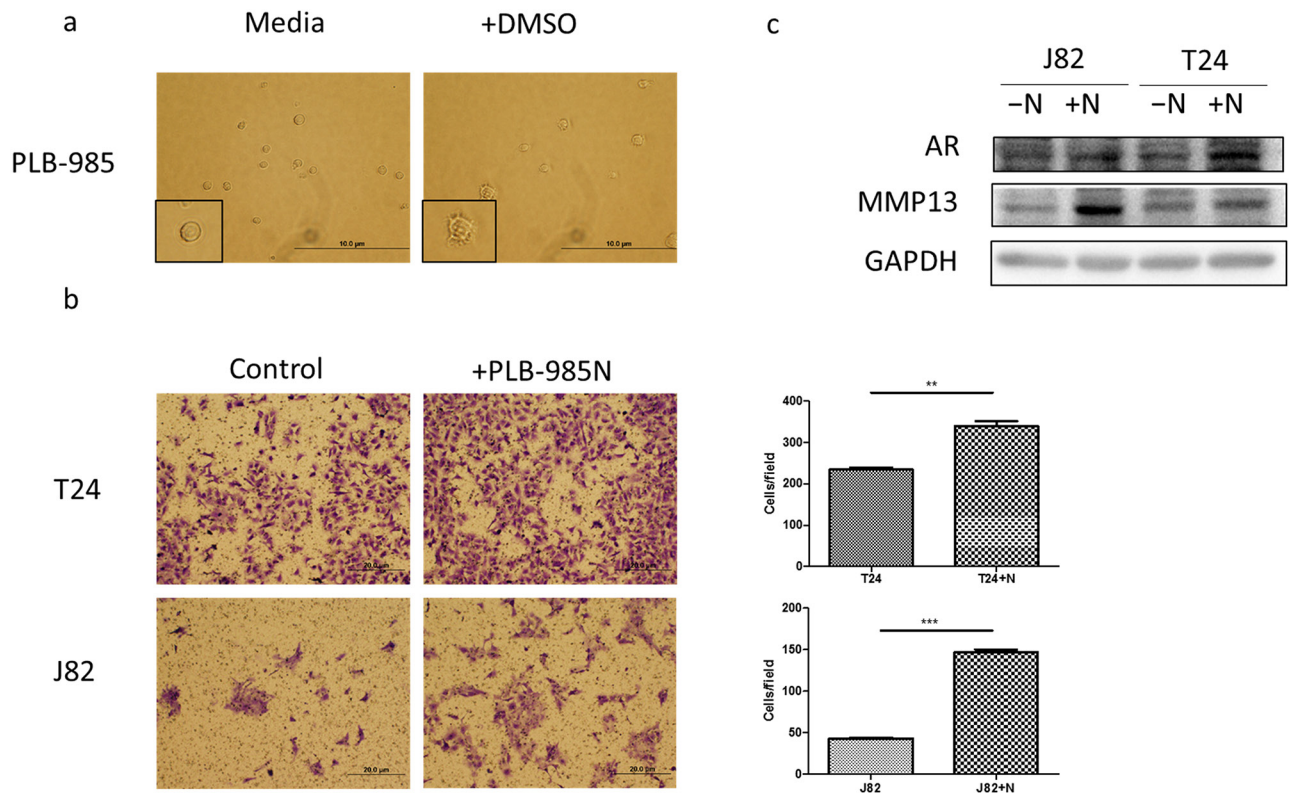

**Supplementary Figure S2: PLB-985-derived neutrophils (PLB-985N) could promote BCa invasion.** **a.** Morphology change after treating cells with 1.25% DMSO (scale bar = 10  $\mu$ m); **b.** Microscopic images of invasion assay (scale bar = 20  $\mu$ m) and quantitation at right of the results of invasion assay. (\*\* $p < 0.01$ ; \*\*\* $p < 0.001$ ). **c.** BCa cells express higher level of AR/MMP13 after co-culturing with PLB-985-derived neutrophils. ( $N = \text{PLB-985N}$ ).

**Supplementary Table S1: Metastasis-related genes screening**

| Unigene   | Symbol   | T24               | J82               |
|-----------|----------|-------------------|-------------------|
|           |          | Change fold (SEM) | Change fold (SEM) |
| Hs.508716 | COL4A2   | 1.5(0.1)          | 1(0.1)            |
| Hs.124503 | ZEB1     | 2.1(0.1)          | 1.2(0.0)          |
| Hs.396530 | HGF      | 3(0.5)            | 1.3(0.3)          |
| Hs.44227  | HPSE     | 1.8(1.3)          | 1(0.0)            |
| Hs.160562 | IGF1     | 0.9(0.2)          | 5.8(0.5)          |
| Hs.83169  | MMP1     | 2.8(0.2)          | 0.9(0.2)          |
| Hs.83169  | MMP13    | 1.4(0.2)          | 1.4(0.4)          |
| Hs.513617 | MMP2     | 1.1(0.1)          | 0.7(0.1)          |
| Hs.297413 | MMP9     | 0.5(0.3)          | 0.9(0.1)          |
| Hs.2399   | MMP14    | 3.3(0.1)          | 1.1(0.0)          |
| Hs.727986 | SMAD3    | 2.1(0.1)          | 0.9(0.0)          |
| Hs.645227 | TGFB1    | 3.3(0.3)          | 1(0.1)            |
| Hs.522632 | TIMP1    | 1.3(0.1)          | 0.9(0.0)          |
| Hs.633514 | TIMP2    | 3(0.2)            | 1.1(0.1)          |
| Hs.73793  | VEGF     | 3.2(0.2)          | 1.1(0.1)          |
| Hs.476018 | CTNNB1   | 1.5(0.0)          | 0.9(0.1)          |
| Hs.502328 | CD44     | 1.1(0.0)          | 1.3(0.1)          |
| Hs.522378 | DAB2IP   | 2.8(0.2)          | 0.9(0.1)          |
| Hs.444082 | EZH2     | 0.6(0.0)          | 1.1(0.1)          |
| Hs.37003  | HRAS     | 1.1(0.0)          | 0.9(0.0)          |
| Hs.95008  | KISS-1   | 0.4(0.0)          | 0.8(0.2)          |
| Hs.132966 | MET      | 1.5(0.0)          | 1(0.1)            |
| Hs.202453 | MYC      | 1.1(0.0)          | 1.1(0.1)          |
| Hs.9235   | NME4     | 1(0.0)            | 1.1(0.0)          |
| Hs.195659 | SRC      | 2.7(0.0)          | 1.1(0.1)          |
| Hs.371720 | SYK      | 3.7(0.4)          | 1(0.1)            |
| Hs.512592 | TP53     | 2.1(0.1)          | 1(0.0)            |
| Hs.124503 | ZEB1     | 1.5(0.0)          | 1.1(0.2)          |
| Hs.418123 | CTSL1    | 1.2(0.0)          | 0.9(0.0)          |
| Hs.597216 | HIF1A    | 1.1(0.1)          | 1(0.0)            |
| Hs.468410 | HIF2A    | 2.7(0.1)          | 0.9(0.0)          |
| Hs.527778 | KAI1     | 1.9(0.1)          | 1(0.2)            |
| Hs.444986 | METAP2   | 1.1(0.0)          | 1.1(0.0)          |
| Hs.525629 | MTA1     | 1.7(0.1)          | 0.8(0.0)          |
| Hs.37982  | NEDD9    | 1(0.1)            | 0.9(0.0)          |
| Hs.55279  | SERPINB5 | 0.9(0.0)          | 0.9(0.0)          |

(Continued)

| Unigene   | Symbol | T24               | J82               |
|-----------|--------|-------------------|-------------------|
|           |        | Change fold (SEM) | Change fold (SEM) |
| Hs.351316 | TM4SF1 | 0.7(0.0)          | 0.8(0.0)          |
| Hs.435215 | FLT4   | ND                | ND                |
| Hs.155983 | JMJDA  | ND                | ND                |

The expression change fold of metastasis-related genes in T24 and J82 after coculturing with HL-60N. (change fold = co-culture/control).

ND: not detectable.

SEM: standard error of the mean.
